# Supplementary material
Source: Springer Nature journal article supplement (https://www.springermedizin.de/resource/supplementary/12884_2013_1056_MOESM3_ESM.pdf/9458808)

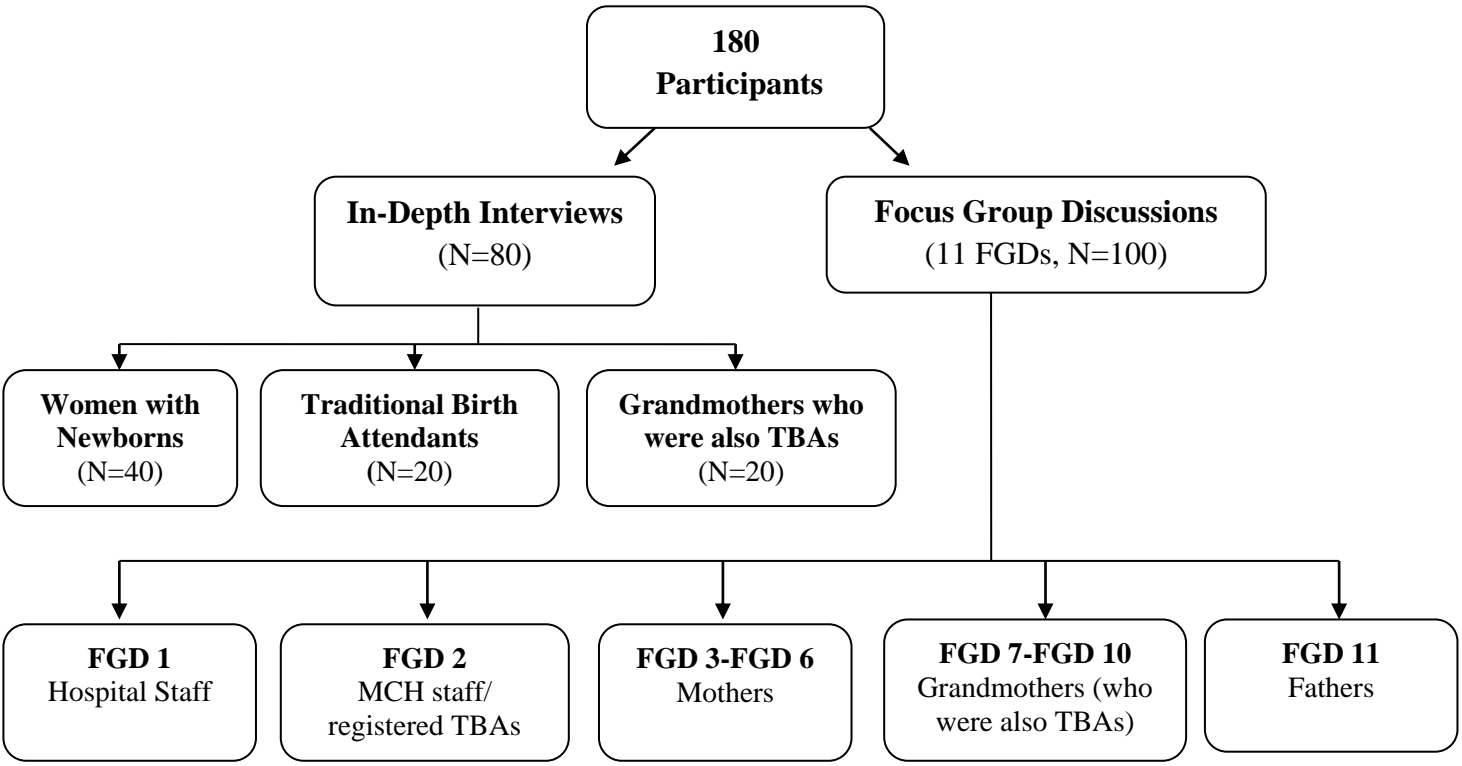

Supplement: MOESM3 [file 9458808]
